# Supplementary material for: Genome Comparison of ‘Candidatus Phytoplasma rubi’ with Genomes of Other 16SrV Phytoplasmas Highlights Special Group Features
Source: MDPI journal article supplement (doi:10.3390/applmicrobiol3030075), 2023-09-12
Supplement: s1 [file s1]

## Supplementary Materials

**Table S1.** Overview of annotated genes with the respective product, pathway, and locus tags for 'Ca. P. rubi' RS and orthologs in 'Ca. P. vitis' CH and 'Ca. P. ziziphi' strains.

|                                                             |             |                        | 'Ca. P. rubi' | 'Ca. P. vitis' | 'Ca. P. ziziphi' | 'Ca. P. ziziphi' |
|-------------------------------------------------------------|-------------|------------------------|---------------|----------------|------------------|------------------|
|                                                             |             |                        | RS            | CH             | Jwb-nky          | Hebei-2018       |
| Product                                                     | Gene        | Pathway/transport      | Locus tags    |                |                  |                  |
| Sucrose phosphorylase                                       | <i>sucP</i> | Glycolysis             | RS022_03900   | M6G77_01020    | CWO85_02970      | L6W10_RS03625    |
| Glucose-6-phosphate isomerase                               | <i>pgi</i>  |                        | RS022_08360   | M6G77_00205    | CWO85_01610      | L6W10_RS01430    |
| 6-phosphofructokinase                                       | <i>pfkA</i> |                        | RS022_07760   | M6G77_00485    | CWO85_02260      | L6W10_RS00790    |
| Fructose-bisphosphate aldolase                              | <i>fba</i>  |                        | RS022_07730   | M6G77_00500    | CWO85_02275      | L6W10_RS00775    |
| Glyceraldehyde 3-phosphate dehydrogenase                    | <i>gapN</i> |                        | RS022_07740   | M6G77_00495    | CWO85_02270      | L6W10_RS00780    |
| Phosphoglycerate kinase                                     | <i>pgk</i>  |                        | RS022_07750   | M6G77_00490    | CWO85_02265      | L6W10_RS00785    |
| 2,3-bisphosphoglycerate-independent phosphoglycerate mutase | <i>gpmI</i> |                        | RS022_07770   | M6G77_00480    | CWO85_02255      | L6W10_RS00795    |
| Enolase                                                     | <i>eno</i>  |                        | RS022_07780   | M6G77_00475    | CWO85_02250      | L6W10_RS00800    |
| Pyruvate kinase                                             | <i>pyk</i>  |                        | RS022_02410   | M6G77_00805    | CWO85_02800      | L6W10_RS00130    |
| Glycerol-3-phosphate dehydrogenase                          | <i>gpsA</i> |                        | RS022_03040   | M6G77_01970    | CWO85_00265      | L6W10_RS02840    |
| Triosephosphate isomerase                                   | <i>tpiA</i> |                        | RS022_02710   | M6G77_00740    | CWO85_02750      | L6W10_RS0018     |
| L-lactate dehydrogenase                                     | <i>ldh</i>  | Malate/Lactate Pathway | RS022_02750   | M6G77_00765    | CWO85_02735      | L6W10_RS00200    |
| Malate dehydrogenase (oxaloacetate-decarboxylating)         | <i>scfA</i> |                        | RS022_00350   | M6G77_00030    | CWO85_01430      | L6W10_RS01635    |
| Pyruvate dehydrogenase E1 component alpha subunit           | <i>pdhA</i> | Acetyl CoA / Acetate   | RS022_04140   | M6G77_01140    | -                | L6W10_RS03175    |
| Pyruvate dehydrogenase E1 component beta subunit            | <i>pdhB</i> |                        | RS022_04150   | M6G77_01145    | -                | -                |
| Pyruvate dehydrogenase E2 component of pyruvate             | <i>pdhC</i> |                        | RS022_04170   | M6G77_01155    | -                | L6W10_RS03190    |

|                                                                   |                  |                                |             |             |             |               |
|-------------------------------------------------------------------|------------------|--------------------------------|-------------|-------------|-------------|---------------|
| dehydrogenase complex                                             |                  |                                |             |             |             |               |
| Dihydrolipoamide dehydrogenase of pyruvate dehydrogenase complex  | <i>pdhD</i>      |                                | RS022_04180 | M6G77_01160 | -           | L6W10_RS03195 |
| Phosphotrans-acetylase NEW: Phosphate acetyltransferase           | <i>pta</i>       |                                | RS022_08060 | M6G77_00335 | CWO85_01945 | L6W10_RS01090 |
| Acetate kinase                                                    | <i>ackA</i>      |                                | RS022_04090 | M6G77_01115 | -           | L6W10_RS03150 |
| Dihydroxyacetone kinase subunit K                                 | <i>dhaK</i>      | Glycerophospholipid metabolism | RS022_02860 | M6G77_02075 | CWO85_00355 | L6W10_RS02750 |
| Cdp-diacylglycerol-glycerol-3-phosphate 3-phosphatidyltransferase | <i>pgsA</i>      |                                | RS022_04040 | M6G77_01100 | -           | L6W10_RS03135 |
| Glycerol-3-phosphate acyltransferase                              | <i>plsY</i>      |                                | RS022_03090 | M6G77_01945 | CWO85_00240 | L6W10_RS02865 |
| 1-Acyl-Sn-glycerol-3-phosphate acyltransferase                    | <i>plsC</i>      |                                | RS022_04130 | M6G77_01135 | -           | L6W10_RS03170 |
| Phosphatidate cytidyltransferase                                  | <i>cdsA</i>      |                                | RS022_02840 | M6G77_02085 | CWO85_00365 | L6W10_RS02740 |
| Cdp-diacylglycerol-serine O-phosphatidyltransferase               | <i>pssA</i>      |                                | RS022_08730 | M6G77_02545 | CWO85_00550 | L6W10_RS02590 |
| Phosphatidylserine decarboxylase                                  | <i>psd</i>       |                                | RS022_08720 | M6G77_02540 | CWO85_00555 | L6W10_RS02585 |
| Holo-[acyl-carrier protein] synthase                              | <i>acpS</i>      |                                | RS022_04210 | M6G77_01175 | CWO85_03535 | L6W10_RS03210 |
| Phosphate acyltransferase                                         | <i>plsX</i>      |                                | RS022_08670 | M6G77_02515 | CWO85_00580 | L6W10_RS02560 |
| peptide ABC transporter permease protein                          | <i>ABC.PE.P</i>  | Peptide ABC transporter        | -           | -           | CWO85_01295 | L6W10_RS01765 |
| peptide ABC transporter permease protein                          | <i>ABC.PE.P1</i> |                                | -           | -           | CWO85_01300 | L6W10_RS01760 |
| peptide ABC transporter ATP binding protein                       | <i>ddpD</i>      |                                | -           | -           | CWO85_01290 | L6W10_RS01770 |
| peptide ABC transporter ATP binding protein                       | <i>ddpF</i>      |                                | -           | -           | CWO85_01285 | L6W10_RS01775 |
| peptide ABC transporter substrate binding protein                 | <i>ABC.PE.S</i>  |                                | -           | -           | CWO85_01305 | L6W10_RS01755 |
|                                                                   |                  |                                | -           | -           | CWO85_01310 | L6W10_RS01750 |

|                                                                        |             |                                                                        |             |             |             |               |
|------------------------------------------------------------------------|-------------|------------------------------------------------------------------------|-------------|-------------|-------------|---------------|
| metal/zinc ABC transporter substrate binding protein                   | <i>troA</i> | Zn <sup>2+</sup> , Mn <sup>2+</sup> , Fe <sup>2+</sup> ABC transporter | RS022_08970 | M6G77_02640 | CWO85_00460 | L6W10_RS02665 |
| metal/zinc ABC transporter ATP binding protein                         | <i>troB</i> |                                                                        | RS022_08980 | M6G77_02645 | CWO85_00455 | L6W10_RS02670 |
| metal/zinc ABC transporter permease                                    | <i>troC</i> |                                                                        | RS022_09000 | M6G77_02650 | CWO85_00450 | L6W10_RS02675 |
| metal/zinc ABC transporter permease                                    | <i>troD</i> |                                                                        | RS022_09010 | M6G77_02655 | CWO85_00445 | L6W10_RS02680 |
| carbohydrate ABC transporter ATPase                                    | <i>malK</i> | Multiple sugar ABC transporter                                         | RS022_00670 | M6G77_00185 | CWO85_01630 | L6W10_RS01410 |
|                                                                        |             |                                                                        | -           | M6G77_01390 | -           | -             |
| carbohydrate ABC transporter permease                                  | <i>malF</i> |                                                                        | RS022_00660 | M6G77_00180 | CWO85_01635 | L6W10_RS01405 |
|                                                                        |             |                                                                        | -           | M6G77_01385 | -           | -             |
| carbohydrate ABC transporter permease                                  | <i>malG</i> |                                                                        | RS022_00650 | M6G77_00175 | CWO85_01640 | L6W10_RS01400 |
|                                                                        |             |                                                                        | -           | M6G77_01380 | -           | -             |
| carbohydrate ABC transporter substrate binding protein                 | <i>malE</i> |                                                                        | RS022_00640 | M6G77_00170 | CWO85_01645 | -             |
|                                                                        |             |                                                                        | -           | M6G77_01375 | CWO85_02785 | L6W10_RS01395 |
| Spermidine/putrescine ABC transporter ATP binding protein              | <i>potA</i> | Spermidine/Putrescine - ABC transporter                                | RS022_03400 | M6G77_01445 | CWO85_02470 | L6W10_RS00575 |
| Spermidine/putrescine import ABC transporter permease component        | <i>potB</i> |                                                                        | RS022_03410 | M6G77_01440 | CWO85_02465 | L6W10_RS00580 |
| Spermidine/putrescine import ABC transporter permease protein PotC     | <i>potC</i> |                                                                        | RS022_03420 | M6G77_01435 | CWO85_02460 | L6W10_RS00585 |
| Spermidine/putrescine import ABC transporter substrate binding protein | <i>potD</i> |                                                                        | RS022_03430 | M6G77_01430 | CWO85_02455 | L6W10_RS00590 |
| Methionine ABC transport system permease protein                       | <i>metI</i> | Methionine ABC transporter                                             | RS022_02500 | M6G77_00850 | CWO85_02845 | -             |
| Methionine ABC transport system ATPase subunit                         | <i>metN</i> |                                                                        | RS022_02480 | M6G77_00840 | CWO85_02835 | L6W10_RS00095 |
| Methionine ABC transport system substrate binding protein              | <i>metQ</i> |                                                                        | RS022_2490  | M6G77_00845 | CWO85_02840 | L6W10_RS00090 |
| Energy-coupling factor transporter ATP-binding protein EcfA1           | <i>ecfA</i> | Biotin transport (incomplete)                                          | RS022_06860 | M6G77_01730 | CWO85_00010 | L6W10_RS03095 |
| Energy-coupling factor transporter                                     | <i>ecfA</i> |                                                                        | RS022_06850 | M6G77_01725 | -           | L6W10_RS03100 |

|                                                                                |              |                                            |             |             |             |               |
|--------------------------------------------------------------------------------|--------------|--------------------------------------------|-------------|-------------|-------------|---------------|
| ATP-binding protein<br>EcfA3                                                   |              |                                            |             |             |             |               |
| Energy-coupling<br>factor transporter<br>transmembrane<br>protein EcfT         | <i>ecfT</i>  |                                            | RS022_06840 | M6G77_01720 | -           | L6W10_RS03105 |
| Multidrug efflux<br>ABC transporter<br>subunit EfrA                            | <i>efrA</i>  | Drug efflux<br>(incomplete)                | RS022_08590 | M6G77_02480 | CWO85_00615 | L6W10_RS02525 |
| Multidrug efflux<br>ABC transporter<br>subunit EfrB                            | <i>efrB</i>  |                                            | RS022_08580 | M6G77_02475 | CWO85_00620 | L6W10_RS02520 |
| unspecific ATP<br>binding protein                                              | -            | Unspecified ABC<br>transport system        | RS022_00590 | M6G77_00145 | CWO85_00600 | L6W10_RS02540 |
|                                                                                | -            |                                            | RS022_08620 | M6G77_02495 | CWO85_01670 | L6W10_RS01365 |
|                                                                                | -            |                                            | -           | -           | CWO85_01675 | L6W10_RS01360 |
| Calcium transporting<br>HAD-IC family P-<br>type ATPase                        | <i>ctpE</i>  | Ca <sup>2+</sup> export                    | RS022_07540 | M6G77_00610 | CWO85_02370 | L6W10_RS00675 |
| Zinc/cadmium/lead-<br>transporting P-type<br>ATPase                            | <i>zntA</i>  | Zn <sup>2+</sup> , Cd <sup>2+</sup> export | RS022_08020 | M6G77_00360 | CWO85_01970 | L6W10_RS01060 |
| Potassium/sodium-<br>transporting P-type<br>ATPase                             | -            | K <sup>+</sup> , Na <sup>+</sup> export    | RS022_04000 | M6G77_01070 | CWO85_02920 | L6W10_RS03675 |
| Malate/Na <sup>+</sup><br>symporter MleP                                       | <i>mleP</i>  | MleP Symporter                             | RS022_04910 | M6G77_01190 | CWO85_03515 | L6W10_RS03225 |
| Malate:Na <sup>+</sup><br>symporter                                            | -            | MleP Symporter<br>(incomplete)             | -           | M6G77_02455 | CWO85_00750 | L6W10_RS02380 |
| Mg <sup>2+</sup> , Co <sup>2+</sup> export<br>channel CorC                     | <i>corC</i>  | CorC channel                               | RS022_04010 | M6G77_01075 | CWO85_02915 | L6W10_RS03680 |
| Multidrug and toxin<br>efflux pump MATE                                        | <i>norM</i>  | MATE channel                               | RS022_08350 | M6G77_00210 | CWO85_01605 | L6W10_RS01435 |
| Large conductance<br>mechanosensitive<br>channel                               | <i>mscL</i>  | MscL channel                               | RS022_06350 | M6G77_01620 | CWO85_03400 | L6W10_RS03335 |
| NAD synthetase/<br>Glutamine<br>amidotransferase<br>chain<br>of NAD synthetase | <i>nadE</i>  | NAD synthase                               | RS022_08240 | M6G77_00270 | CWO85_01880 | L6W10_RS01155 |
| Signal recognition<br>particle subunit Srp54                                   | <i>srp54</i> | SEC System                                 | RS022_08090 | M6G77_00320 | CWO85_01930 | L6W10_RS01105 |
| Signal recognition<br>particle receptor FtsY                                   | <i>ftsY</i>  |                                            | RS022_08100 | M6G77_00315 | CWO85_01925 | L6W10_RS01110 |
| Preprotein<br>translocase subunit<br>SecA                                      | <i>secA</i>  |                                            | RS022_08270 | M6G77_00255 | CWO85_01865 | L6W10_RS01170 |
| Preprotein<br>translocase subunit<br>SecY                                      | <i>secY</i>  |                                            | RS022_06940 | M6G77_01770 | CWO85_00050 | L6W10_RS03055 |
| Preprotein<br>translocase subunit<br>SecE                                      | <i>secE</i>  |                                            | RS022_07510 | M6G77_00625 | CWO85_02385 | L6W10_RS00660 |

|                                 |             |                   |             |             |             |               |
|---------------------------------|-------------|-------------------|-------------|-------------|-------------|---------------|
| Membrane protein insertase YidC | <i>yidC</i> |                   | RS022_08560 | M6G77_02450 | CWO85_00745 | L6W10_RS02385 |
| Variable membrane protein B     | <i>vmpB</i> | Membrane proteins | RS022_00510 | M6G77_00110 | CW085_01775 | L6W10_RS01260 |
| Variable membrane protein A     | <i>vmpA</i> |                   | RS022_07990 | M6G77_00370 | CW085_02145 | L6W10_RS00905 |
| Immunodominant membrane protein | <i>imp</i>  |                   | RS022_08700 | M6G77_02530 | CWO85_00565 | L6W10_RS02575 |
| HAD-IIB family hydrolase        | -           | Hydrolase         | RS022_07720 | M6G77_00505 | CWO85_02280 | L6W10_RS00770 |
| SAP11-like effector protein     | -           | Effector          | RS022_07360 | -           | CWO85_00890 | L6W10_RS00460 |
| SAP11-like effector protein     | -           | Effector          | RS022_01010 | -           | CWO85_02055 | L6W10_RS01985 |
| SAP54-like effector protein     | -           | Effector          | RS022_04960 | -           | CWO85_03080 | L6W10_RS02315 |

**Table S2.** Overview of products with predicted signal peptide and corresponding locus tag for ‘*Ca. P. rubi*’ RS, ‘*Ca. P. vitis*’ CH and ‘*Ca. P. ziziphi*’ strains. Products without assigned orthogroup are unique to the respective strain.

|            | 'Ca. P. rubi' |                                           | 'Ca. P. vitis' |                                         | 'Ca. P. ziziphi' |                                 | 'Ca. P. ziziphi' |                                           |
|------------|---------------|-------------------------------------------|----------------|-----------------------------------------|------------------|---------------------------------|------------------|-------------------------------------------|
|            | RS            |                                           | CH             |                                         | Jwb-nky          |                                 | Hebei-2018       |                                           |
| Orthogroup | Locus tag     | Product                                   | Locus tag      | Product                                 | Locus tag        | Product                         | Locus tag        | Product                                   |
| 1          | RS022_05620   | hypothetical protein                      | -              | -                                       | CWO85_02685      | hypothetical protein            | L6W10_RS00255    | hypothetical protein                      |
| 2          | -             | -                                         | -              | -                                       | CWO85_02710      | hypothetical protein            | L6W10_RS00225    | hypothetical protein                      |
| 3          | -             | -                                         | M6G77_01360    | hypothetical protein                    | CWO85_02715      | hypothetical protein            | L6W10_RS00220    | hypothetical protein                      |
| 4          | -             | -                                         | -              | -                                       | CWO85_00895      | hypothetical protein            | L6W10_RS01980    | hypothetical protein                      |
| 5          | RS022_07820   | hypothetical protein                      | M6G77_00455    | hypothetical protein                    | CWO85_02230      | hypothetical protein            | L6W10_RS00820    | hypothetical protein                      |
| 6          | RS022_08230   | tRNA-specific 2-thiouridylase             | M6G77_00275    | tRNA 2-thiouridine(34) synthase         | CWO85_01885      | tRNA 2-thiouridine(34) synthase | L6W10_RS01150    | tRNA 2-thiouridine(34) synthase           |
| 7          | -             | -                                         | M6G77_00800    | hypothetical protein                    | CWO85_02790      | hypothetical protein            | L6W10_RS00140    | hypothetical protein                      |
| 8          | -             | -                                         | -              | -                                       | CWO85_03065      | hypothetical protein            | L6W10_RS01000    | hypothetical protein                      |
| 9          | -             | -                                         | -              | -                                       | CWO85_01755      | hypothetical protein            | L6W10_RS01280    | hypothetical protein                      |
| 10         | RS022_01330   | tRNA (adenine(22)-N(1))-methyltransferase | M6G77_00220    | class I SAM-dependent methyltransferase | CWO85_01100      | SAM-dependent methyltransferase | L6W10_RS02095    | tRNA (adenine(22)-N(1))-methyltransferase |
| 11         | RS022_07320   | SVM family protein                        | -              | -                                       | CWO85_02040      | effector protein                | L6W10_RS01995    | SVM family protein                        |
| 12         | RS022_04960   | SAP54-like effector protein               | -              | -                                       | CWO85_03080      | SAP54-like effector protein     | L6W10_RS02315    | SAP54-like effector protein               |
| 13         | RS022_04720   | SVM family protein                        | -              | -                                       | CWO85_00800      | effector protein                | L6W10_RS00985    | SVM family protein                        |
| 14         | RS022_05130   | SVM family protein                        | -              | -                                       | CWO85_01380      | effector protein                | L6W10_RS01680    | effector protein                          |

|    |             |                                         |             |                      |             |                             |               |                             |
|----|-------------|-----------------------------------------|-------------|----------------------|-------------|-----------------------------|---------------|-----------------------------|
| 15 | RS022_05950 | hypothetical protein                    | M6G77_00980 | hypothetical protein | CWO85_01420 | hypothetical protein        | L6W10_RS01645 | hypothetical protein        |
| 16 | RS022_05960 | SVM family protein                      | -           | -                    | CWO85_01495 | effector protein            | L6W10_RS01555 | effector protein            |
| 17 | RS022_07360 | SAP11-like effector protein             | -           | -                    | CWO85_00890 | SAP11-like effector protein | L6W10_RS00460 | SAP11-like effector protein |
| 18 | RS022_05940 | SVM family protein                      | -           | -                    | CWO85_03070 | hypothetical protein        | L6W10_RS00995 | SVM family protein          |
| 19 | -           | -                                       | -           | -                    | CWO85_01425 | hypothetical protein        | L6W10_RS01640 | SVM family protein          |
| 20 | RS022_05930 | SVM family protein                      | M6G77_00940 | SVM family protein   | -           | -                           | -             | -                           |
| 21 | RS022_01010 | SAP11-like effector protein             | -           | -                    | CWO85_02055 | SAP11-like effector protein | L6W10_RS01985 | SAP11-like effector protein |
| -  | -           | -                                       | M6G77_00930 | hypothetical protein | -           | -                           | -             | -                           |
| -  | -           | -                                       | M6G77_01515 | hypothetical protein | -           | -                           | -             | -                           |
| -  | -           | -                                       | M6G77_02130 | hypothetical protein | -           | -                           | -             | -                           |
| -  | -           | -                                       | M6G77_02535 | CTP synthase         | -           | -                           | -             | -                           |
| -  | -           | -                                       | M6G77_02680 | SVM family protein   | -           | -                           | -             | -                           |
| -  | -           | -                                       | -           | -                    | -           | -                           | L6W10_RS00440 | hypothetical protein        |
| -  | -           | -                                       | -           | -                    | -           | -                           | L6W10_RS01505 | hypothetical protein        |
| -  | -           | -                                       | -           | -                    | -           | -                           | L6W10_RS01865 | hypothetical protein        |
| -  | -           | -                                       | -           | -                    | -           | -                           | L6W10_RS02325 | SVM family protein          |
| -  | -           | -                                       | -           | -                    | -           | -                           | L6W10_RS02630 | hypothetical protein        |
| -  | -           | -                                       | -           | -                    | -           | -                           | L6W10_RS03415 | hypothetical protein        |
| -  | -           | -                                       | -           | -                    | -           | -                           | L6W10_RS03615 | hypothetical protein        |
| -  | -           | -                                       | -           | -                    | CWO85_00790 | hypothetical protein        | -             | -                           |
| -  | -           | -                                       | -           | -                    | CWO85_02325 | hypothetical protein        | -             | -                           |
| -  | -           | -                                       | -           | -                    | CWO85_03290 | hypothetical protein        | -             | -                           |
| -  | RS022_00200 | SVM family protein                      | -           | -                    | -           | -                           | -             | -                           |
| -  | RS022_00250 | hypothetical protein                    | -           | -                    | -           | -                           | -             | -                           |
| -  | RS022_02340 | SVM family protein                      | -           | -                    | -           | -                           | -             | -                           |
| -  | RS022_02400 | hypothetical protein                    | -           | -                    | -           | -                           | -             | -                           |
| -  | RS022_03040 | gpsA Glycerol-3-phosphate dehydrogenase | -           | -                    | -           | -                           | -             | -                           |
| -  | RS022_03200 | SVM family protein                      | -           | -                    | -           | -                           | -             | -                           |
| -  | RS022_03840 | hypothetical protein                    | -           | -                    | -           | -                           | -             | -                           |
| -  | RS022_03890 | hypothetical protein                    | -           | -                    | -           | -                           | -             | -                           |

|   |                 |                             |   |   |   |   |   |   |
|---|-----------------|-----------------------------|---|---|---|---|---|---|
| - | RS022_0<br>4320 | hypothetical protein        | - | - | - | - | - | - |
| - | RS022_0<br>4710 | SVM family protein          | - | - | - | - | - | - |
| - | RS022_0<br>4900 | DJ-1/PfpI family<br>protein | - | - | - | - | - | - |
| - | RS022_0<br>5740 | SVM family protein          | - | - | - | - | - | - |
| - | RS022_0<br>5750 | SVM family protein          | - | - | - | - | - | - |
| - | RS022_0<br>6150 | SVM family protein          | - | - | - | - | - | - |
| - | RS022_0<br>6460 | hypothetical protein        | - | - | - | - | - | - |
| - | RS022_0<br>6490 | hypothetical protein        | - | - | - | - | - | - |
| - | RS022_0<br>6660 | hypothetical protein        | - | - | - | - | - | - |
| - | RS022_0<br>7350 | SVM family protein          | - | - | - | - | - | - |
| - | RS022_0<br>8450 | hypothetical protein        | - | - | - | - | - | - |
